# Supplementary material for: Proteomic Deep Mining the Venom of the Red-Headed Krait, Bungarus flaviceps
Source: MDPI journal article supplement (doi:10.3390/toxins10090373), 2018-09-13
Supplement: s1 [file s1]

Supplemental Table 2.

| Protein family | Protein                                       | Accession no. | Species                      | Peptide                          | m/z      | $\Delta$ ppm |
|----------------|-----------------------------------------------|---------------|------------------------------|----------------------------------|----------|--------------|
| 3FTx           | Non-conventional three finger toxin isoform 1 | 294961050     | <i>Bungarus flaviceps</i>    | E.SWSTAR.G                       | 354.1763 | -2.52        |
|                |                                               |               |                              | K.ESWSTAR.G                      | 418.6975 | -2.4         |
|                |                                               |               |                              | K.VCSGEEIYCFK.E                  | 696.3013 | -1.25        |
|                |                                               |               |                              | K.ICQFNTCRPGELK.V                | 811.8916 | -1.13        |
|                |                                               |               |                              | K.VCSGEEIYCFKESWSTAR.G           | 736.9929 | -2.19        |
|                |                                               |               |                              | K.ICQFNTCRPGELKVCSGEEIYCFK.E     | 749.8442 | 4.74         |
| 3FTx           | Non-conventional three finger toxin isoform 6 | 294961060     | <i>Bungarus flaviceps</i>    | R.FYEGK.R                        | 322.1574 | -1.63        |
|                |                                               |               |                              | T.LTCLICPEK.Y                    | 567.2878 | -0.81        |
|                |                                               |               |                              | T.LTCLICPEKYCQK.V                | 571.6105 | 0.02         |
|                |                                               |               |                              | R.GCAATCPEAKPHEIVECCSTDK.C       | 2520.07  | 2.27         |
|                |                                               |               |                              | R.GCAATCPEAKPHEIVECCSTDKNK.-     | 2922.26  | 9.44         |
| 3FTx           | Short-chain three finger toxin isoform 4      | 294961042     | <i>Bungarus flaviceps</i>    | K.MYFSDHR.G                      | 319.1407 | -1.52        |
|                |                                               |               |                              | R.GCVATCPTNNR.Y                  | 625.2732 | -1.7         |
|                |                                               |               |                              | R.GCVATCPTNNRYDR.V               | 562.2427 | -1.85        |
|                |                                               |               |                              | T.RICYNQQSTTPPTTENCEPGKNVCYK.M   | 787.1072 | -2.12        |
| 3FTx           | Short-chain three finger toxin isoform 7      | 294961048     | <i>Bungarus flaviceps</i>    | R.GCIAACPK.P                     | 438.706  | -2.11        |
|                |                                               |               |                              | K.NEMIQCCSK.D                    | 585.2402 | -1.45        |
|                |                                               |               |                              | R.GCIAACPKPK.K                   | 551.28   | -1.41        |
|                |                                               |               |                              | K.KNEMIQCCSK.D                   | 649.2877 | -1.29        |
|                |                                               |               |                              | K.RGCIAACPKPK.K                  | 315.1688 | -1.77        |
|                |                                               |               |                              | K.TCPSGQNVCFK.K                  | 649.2855 | -2.12        |
|                |                                               |               |                              | K.KNEMIQCCSKDK.C                 | 514.5628 | -1.13        |
|                |                                               |               |                              | K.TCPSGQNVCFKK.W                 | 1425.66  | -0.03        |
|                |                                               |               |                              | R.DNESSKTCPSGQNVCFK.K            | 653.2844 | 0.34         |
| 3FTx           | Short-chain three finger toxin isoform 6      | 294961046     | <i>Bungarus flaviceps</i>    | K.NSWIYR.G                       | 419.7129 | -2.35        |
|                |                                               |               |                              | R.GCSLTCPDIK.S                   | 575.765  | -0.43        |
|                |                                               |               |                              | K.SNGKIYCTR.D                    | 474.8755 | -1.55        |
|                |                                               |               |                              | K.LCYNHQSTNPK.T                  | 454.5462 | -1.84        |
|                |                                               |               |                              | T.KLCYNHQSTNPK.T                 | 1489.72  | -0.14        |
|                |                                               |               |                              | R.GCSLTCPDIKSNGK.Y               | 513.2361 | -2.99        |
|                |                                               |               |                              | K.TTELCGHSMYFCYK.N               | 1796.74  | 1.85         |
| 3FTx           | Short-chain three finger toxin isoform 1      | 294961036     | <i>Bungarus flaviceps</i>    | K.YIYCCTR.D                      | 518.2225 | -0.95        |
| 3FTx           | κ-bungarotoxin                                | 809178        | <i>Bungarus multicinctus</i> | T.NVCYTHESANPK.T                 | 473.8815 | -1.47        |
| 3FTx           | Short-chain three finger toxin isoform 3      | 294961040     | <i>Bungarus flaviceps</i>    | R.SLLCCTTDNCNH.-                 | 748.2842 | 0.11         |
| 3FTx           | κ-flavitoxin                                  | 128938        | <i>Bungarus flaviceps</i>    | K.SSWIYR.G                       | 406.2072 | -3.15        |
|                |                                               |               |                              | K.AFCDR.W                        | 334.644  | -1.99        |
|                |                                               |               |                              | K.GQDICFTK.A                     | 484.7288 | -0.31        |
|                |                                               |               |                              | K.SLLCCTTDNCNH.-                 | 748.2842 | 0.11         |
|                |                                               |               |                              | K.GQDICFTKAFCDR.W                | 539.9088 | -1.94        |
|                |                                               |               |                              | R.TCLISPSSTSQTCPK.G              | 833.8908 | -1.96        |
|                |                                               |               |                              | -.RTCLISPSSTSQTCPK.G             | 608.2971 | -0.98        |
|                |                                               |               |                              | R.GPVIEQGCAATCPEFTSR.Y           | 1979.9   | 0.51         |
|                |                                               |               |                              | -.RTCLISPSSTSQTCPKGQDICFTK.A     | 693.8319 | -2.09        |
|                |                                               |               |                              | K.AFCDRWCSSRGPVIEQGCAATCPEFTSR.Y | 827.3643 | 5.1          |



|                           |                                                 |           |                           |                               |          |       |
|---------------------------|-------------------------------------------------|-----------|---------------------------|-------------------------------|----------|-------|
| 3FTx                      | Muscarinic toxin-like protein                   | 294961066 | <i>Bungarus flaviceps</i> | K.KYPVMLK.R                   | 439.7615 | -1.13 |
|                           |                                                 |           |                           | K.ILICCPTR.N                  | 516.77   | -0.23 |
|                           |                                                 |           |                           | K.KYPVMLKR.G                  | 345.5437 | -1.31 |
|                           |                                                 |           |                           | R.GCVTTCTGPK.G                | 540.7433 | -1.71 |
|                           |                                                 |           |                           | K.SYWVNEFGNK.Q                | 1243.57  | 0.48  |
|                           |                                                 |           |                           | R.CCPEGQDSCYK.S               | 702.2548 | -0.06 |
|                           |                                                 |           |                           | M.CVRPYPFDSER.C               | 514.2328 | -0.59 |
|                           |                                                 |           |                           | R.MCNMCVRPYPFDSER.C           | 698.2838 | 1.12  |
|                           |                                                 |           |                           | T.RMCNMCVRPYPFDSER.C          | 562.9902 | 1.51  |
| Serine protease inhibitor | $\beta$ -bungarotoxin B chain precursor         | 31745053  | <i>Bungarus flaviceps</i> | R.FSYGGCK.G                   | 409.6784 | -0.75 |
|                           |                                                 |           |                           | R.HPDCDKPPNK.K                | 403.1884 | -1.35 |
|                           |                                                 |           |                           | R.CTGHIPAFYYN.P               | 671.7983 | 0.6   |
|                           |                                                 |           |                           | K.TPQLCMCHCHE.-               | 736.7795 | -1.43 |
|                           |                                                 |           |                           | K.RHPDCDKPPNK.K               | 455.2215 | -2.56 |
|                           |                                                 |           |                           | R.CTGHIPAFYYNPQR.K            | 575.2709 | -1.67 |
|                           |                                                 |           |                           | R.CTGHIPAFYYNPQRK.T           | 1851.9   | 0.66  |
| Serine protease inhibitor | Kunitz-type serine protease inhibitor isoform 5 | 294961076 | <i>Bungarus flaviceps</i> | A.FYYHPASNK.C                 | 563.7713 | 3.31  |
|                           |                                                 |           |                           | K.FAFYYHPASNK.C               | 1344.63  | 0.13  |
|                           |                                                 |           |                           | G.GCGGNDNNFK.T                | 541.7185 | -2.08 |
|                           |                                                 |           |                           | R.KFAFYHPASNK.C               | 736.869  | -0.9  |
|                           |                                                 |           |                           | K.YCNLPPEPGPCHGRK.K           | 551.913  | -1.05 |
|                           |                                                 |           |                           | K.YCNLPPEPGPCHGRK.F           | 594.6114 | -0.78 |
|                           |                                                 |           |                           | K.EFVYGGCGGNDNNFK.T           | 839.8401 | -4.29 |
| Serine protease inhibito  | Kunitz-type serine protease inhibitor isoform 1 | 294961068 | <i>Bungarus flaviceps</i> | K.CKEFVYGGCGGNDNNFK.T         | 1965.81  | -3.83 |
|                           |                                                 |           |                           | R.VYYYIPAAR.K                 | 558.2967 | -1.93 |
|                           |                                                 |           |                           | K.RVYYYIPAAR.K                | 1271.69  | 1.04  |
|                           |                                                 |           |                           | R.KCEFYIYGGCK.G               | 1389.63  | -0.12 |
| Acetylcholinesterase      | Acetylcholinesterase                            | 1389604   | <i>Bungarus flaviceps</i> | L.GVPEYCNLPDPGPCDAYKR.V       | 2305.04  | 0.0   |
|                           |                                                 |           |                           | R.ADFLEGVR.M                  | 453.7366 | -2.24 |
|                           |                                                 |           |                           | V.YAYLFDHR.A                  | 362.1779 | -1.69 |
|                           |                                                 |           |                           | K.VSTQTGSVR.G                 | 467.7505 | -1.66 |
|                           |                                                 |           |                           | K.VYAYLFDHR.A                 | 395.2009 | -1.03 |
|                           |                                                 |           |                           | K.ETQVLLGVVK.D                | 543.3312 | -1.19 |
|                           |                                                 |           |                           | K.LLNATVDPPR.A                | 548.311  | -0.92 |
|                           |                                                 |           |                           | E.LKVSTQTGSVR.G               | 392.5623 | -1.74 |
|                           |                                                 |           |                           | K.LLNATVDPPRA.D               | 583.8295 | -0.96 |
|                           |                                                 |           |                           | K.LLNATVDPPRAD.-              | 641.3424 | -1.71 |
|                           |                                                 |           |                           | R.AQICAFWNHFLPK.L             | 544.9366 | -2.42 |
|                           |                                                 |           |                           | R.AQICAFWNHFLPK.L             | 582.3047 | 0.19  |
|                           |                                                 |           |                           | K.DEGSYFLIYGLPGFSK.D          | 598.2967 | -2.07 |
|                           |                                                 |           |                           | K.NPQELIDEEWSVLPYK.S          | 980.4896 | 1.04  |
|                           |                                                 |           |                           | K.QLGCHFNNDSLVCLR.S           | 677.9699 | -2.93 |
|                           |                                                 |           |                           | R.SKNPQELIDEEWSVLPYK.S        | 725.7041 | 0.44  |
|                           |                                                 |           |                           | R.FLRPEPVKPWQHVLDATSYK.P      | 804.4313 | -3.22 |
|                           |                                                 |           |                           | R.AILQSGGPNAPWATVTPAESR.G     | 708.3672 | -0.45 |
|                           |                                                 |           |                           | K.DEGSYFLIYGLPGFSKDNESLISR.A  | 903.1122 | -1.03 |
|                           |                                                 |           |                           | R.MRFLRPEPVKPWQHVLDATSYK.P    | 679.3591 | -3.34 |
|                           |                                                 |           |                           | R.VGAFGFLGLPGSPEAPGNMGLLDQR.L | 834.4276 | 7.58  |



|                      |                                               |           |                    |                                                |          |       |
|----------------------|-----------------------------------------------|-----------|--------------------|------------------------------------------------|----------|-------|
| Acetylcholinesterase | Acetylcholinesterase DEN-1                    | 476538388 | Denisoniadevisi    | N.NKYYAYLFDHR.A                                | 475.9136 | -0.68 |
|                      |                                               |           |                    | R.AILQSGGPNAPWATVTPAESR.R                      | 2123.1   | 7.55  |
|                      |                                               |           |                    | S.AVTIFGESAGAASVGMHLLSTQSR.A                   | 797.4089 | -0.51 |
|                      |                                               |           |                    | R.GLSLPVLDGHVSAFLGIPFAEPPVGR.M                 | 882.4869 | 0.41  |
| PLA <sub>2</sub>     | β-bungarotoxin A <sub>2</sub> chain precursor | 31745049  | Bungarus flaviceps | P.IDALDR.C                                     | 351.6921 | -1.51 |
|                      |                                               |           |                    | K.VVSYSSK.C                                    | 385.2072 | -2.39 |
|                      |                                               |           |                    | S.LNLLQFK.D                                    | 438.2704 | -1.52 |
|                      |                                               |           |                    | R.CTIPCER.T                                    | 468.2068 | -1.18 |
|                      |                                               |           |                    | R.FVCDCCR.T                                    | 486.1886 | -1.03 |
|                      |                                               |           |                    | L.LQFKDMIR.C                                   | 525.7927 | 1.64  |
|                      |                                               |           |                    | L.NLLQFKDMIR.C                                 | 639.3586 | 5.15  |
|                      |                                               |           |                    | S.LNLLQFKDMIR.C                                | 464.2672 | -0.42 |
|                      |                                               |           |                    | R.TLFCYDAPGSCAR.F                              | 759.3281 | -1.53 |
|                      |                                               |           |                    | R.TAALCFGDSEYIGR.H                             | 780.3607 | -1.09 |
|                      |                                               |           |                    | K.RTLFCYDAPGSCAR.F                             | 558.5884 | -1.01 |
|                      |                                               |           |                    | R.CCYVHDNCYGDAEKR.N                            | 649.5897 | -1.65 |
|                      |                                               |           |                    | A.SNIPPQSLNLLQFKDMIR.C                         | 706.3754 | 7.98  |
|                      |                                               |           |                    | R.TWGEYADYGCYCGAGSGR.P                         | 696.2728 | 1.02  |
|                      |                                               |           |                    | R.FVCDCDRTAALCFGDSEYIGR.H                      | 838.0253 | -3.09 |
|                      |                                               |           |                    | R.TWGEYADYGCYCGAGSGRPIDALDR.C                  | 2867.24  | 8.79  |
| PLA <sub>2</sub>     | β-bungarotoxin A <sub>1</sub> chain precursor | 31745051  | Bungarus flaviceps | K.GGSGRPVDALDR.C                               | 400.5422 | -0.62 |
|                      |                                               |           |                    | R.CCYVHDNCYGEAQK.R                             | 601.9003 | -1.06 |
|                      |                                               |           |                    | R.CCYVHDNCYGEAQKR.N                            | 1959.79  | -1.15 |
| PLA <sub>2</sub>     | Phospholipase A <sub>2</sub> II precursor     | 31745057  | Bungarus flaviceps | K.CSPYYK.T                                     | 409.1806 | -1.25 |
|                      |                                               |           |                    | D.YGCYCGK.G                                    | 454.1750 | -1.08 |
|                      |                                               |           |                    | A.DYGCYCGK.G                                   | 511.6888 | -0.34 |
|                      |                                               |           |                    | K.TYKYDCSEGK.L                                 | 625.7708 | -1.14 |
|                      |                                               |           |                    | K.LTCNDAPGSCER.S                               | 690.2856 | -2.86 |
|                      |                                               |           |                    | R.VAAICFAGAPYN.D                               | 627.3018 | -1.55 |
|                      |                                               |           |                    | K.GGGGTPVDELDR.C                               | 586.7801 | -1.13 |
|                      |                                               |           |                    | R.VAAICFAGAPYNDK.N                             | 748.8632 | -0.70 |
|                      |                                               |           |                    | R.CCQTHDNCYGEAEK.L                             | 591.2197 | -1.27 |
|                      |                                               |           |                    | R.ATWHYADYGCYCGK.G                             | 876.3512 | 0.59  |
|                      |                                               |           |                    | R.VAAICFAGAPYNDKN.F                            | 805.8862 | 1.20  |
|                      |                                               |           |                    | L.NLIQFSSLIQCANGGSR.A                          | 933.4729 | 11.3  |
|                      |                                               |           |                    | R.CCQTHDNCYGEAEKLT.K.C                         | 705.2940 | -2.97 |
|                      |                                               |           |                    | R.VAAICFAGAPYNDKNF.M                           | 879.4216 | 2.52  |
|                      |                                               |           |                    | R.VAAICFAGAPYNDKNFM.I                          | 944.9362 | -3.64 |
|                      |                                               |           |                    | K.TYKYDCSEGKLT.CNDAPGSCER.S                    | 871.0300 | -3.91 |
|                      |                                               |           |                    | R.SVCDCCRVAICFAGAPYNDK.N                       | 797.0167 | -0.65 |
|                      |                                               |           |                    | R.SVCDCCRVAICFAGAPYNDKN.F                      | 835.0339 | 2.95  |
|                      |                                               |           |                    | K.GGGGTPVDELDRCCQTHDNCYGEAEK.L                 | 2925.22  | 14.0  |
|                      |                                               |           |                    | R.ATWHYADYGCYCGKGGGTPVDELDR.C                  | 727.0647 | 2.23  |
|                      |                                               |           |                    | L.NLIQFSSLIQCANGGSRATWHYADYGCYCGKGGGTPVDELDR.C | 951.4310 | 2.52  |



|                  |                                        |           |                               |                                       |           |        |
|------------------|----------------------------------------|-----------|-------------------------------|---------------------------------------|-----------|--------|
| PLA <sub>2</sub> | Phospholipase A <sub>2</sub>           | 263083    | <i>Bungarus fasciatus</i>     | D.VDLETR.C                            | 366.6975  | -1.39  |
|                  |                                        |           |                               | R.TAALCFAGAP.Y                        | 489.7386  | -1.39  |
|                  |                                        |           |                               | K.SMVQCTSTRPWL.D                      | 733.8500  | 11.0   |
|                  |                                        |           |                               | K.SMVQCTSTRPWL.D.Y                    | 790.8622  | -1.58  |
|                  |                                        |           |                               | A.PYNQNNFDVDLETR.C                    | 863.8793  | -2.43  |
|                  |                                        |           |                               | R.TAALCFAGAPYNNQNNF.D                 | 879.8990  | 0.16   |
|                  |                                        |           |                               | R.TAALCFAGAPYNNQNNFDVDLETR.C          | 2587.18   | -2.04  |
|                  |                                        |           |                               | R.TAALCFAGAPYNNQNNFDVDLETRCQ.-        | 959.0962  | -1.18  |
| PLA <sub>2</sub> | Phospholipase A <sub>2</sub> precursor | 31745055  | <i>Bungarus flaviceps</i>     | N.FFISFK.E                            | 394.7224  | 4.17   |
|                  |                                        |           |                               | D.NFFISFK.E                           | 451.7415  | -1.58  |
|                  |                                        |           |                               | R.SVCDCCR.V                           | 456.1702  | -1.61  |
|                  |                                        |           |                               | Y.AHYGCYCGK.G                         | 558.2226  | -1.6   |
|                  |                                        |           |                               | H.YAHYGCYCGK.G                        | 639.7544  | -1.2   |
|                  |                                        |           |                               | K.YDCSEGKLTCK.D                       | 680.7963  | -1.3   |
|                  |                                        |           |                               | K.LTCKDAPGSCER.S                      | 1392.6207 | 0.61   |
|                  |                                        |           |                               | K.GGGGTAVDELDR.C                      | 573.7725  | -0.71  |
|                  |                                        |           |                               | K.TYKYDCSEGKLTCK.D                    | 584.9348  | -1.85  |
|                  |                                        |           |                               | R.PTWHYAHYGCYCGK.G                    | 600.5853  | -0.25  |
|                  |                                        |           |                               | N.RPTWHYAHYGCYCGK.G                   | 489.7163  | 0.3    |
|                  |                                        |           |                               | R.CCQTHDNCYGEAEKLPK.C                 | 528.2242  | -1.67  |
|                  |                                        |           |                               | K.YDCSEGKLTCKDAPGSCER.S               | 744.9813  | -1.08  |
|                  |                                        |           |                               | H.GNRPTWHYAHYGCYCGK.G                 | 709.9676  | -1.41  |
|                  |                                        |           |                               | R.VAANCFAGAPYNNDNFFISFK.E             | 789.7009  | 0.76   |
|                  |                                        |           |                               | R.SVCDCCRVAANCFAGAPYNN.D              | 2260.9194 | 1.13   |
|                  |                                        |           |                               | R.VAANCFAGAPYNNDNFFISFKEN.C           | 870.7296  | 0.89   |
|                  |                                        |           |                               | M.IQCANHGNRPTWHYAHYGCYCGK.G           | 713.3166  | 8.89   |
|                  |                                        |           |                               | R.VAANCFAGAPYNNDNFFISFKENCQ.-         | 966.7565  | -2.12  |
|                  |                                        |           |                               | K.GGGGTAVDELDRCCQTHDNCYGEAEKLPK.C     | 3237.41   | 3.93   |
|                  |                                        |           |                               | R.SVCDCCRVAANCFAGAPYNNDNFFISFKENCQ.-  | 3790.7    | 32.1   |
|                  |                                        |           |                               | L.NLYQFNNMIQCANHGNRPTWHYAHYGCYCGK.G   | 3875.64   | -1.03  |
|                  |                                        |           |                               | Q.PLNLYQFNNMIQCANHGNRPTWHYAHYGCYCGK.G | 682.1191  | -17.98 |
| PLA <sub>2</sub> | Phospholipase A <sub>2</sub> isoform 3 | 294961092 | <i>Bungarus flaviceps</i>     | R.FVCDCCRVAAN.C                       | 663.7806  | -2.01  |
|                  |                                        |           |                               | A.GAPYNDKNFMINFK.T                    | 553.6046  | -0.14  |
|                  |                                        |           |                               | R.CCQTHDNCYDEAEKLT.K.C                | 543.7244  | -1.46  |
|                  |                                        |           |                               | R.VAANCFAGAPYNDKNFMINFK.T             | 803.7106  | 7.12   |
|                  |                                        |           |                               | L.NLIQFSSLIQCANGGSRPTWHYADYGCYCGK.G   | 3623.6895 | 17.7   |
| PLA <sub>2</sub> | Phospholipase A <sub>2</sub> Kbf-III   | 110559306 | <i>Bungarus fasciatus</i>     | K.NMIQCAGTR.S                         | 525.7441  | -0.97  |
|                  |                                        |           |                               | S.YDCSEGKLTCK.A                       | 1360.588  | 0.62   |
|                  |                                        |           |                               | K.NMIQCAGTR.S.W                       | 569.2602  | -0.73  |
|                  |                                        |           |                               | - .NLFQFKNMIQCAGTR.S.W                | 639.3154  | 8.49   |
| PLA <sub>2</sub> | Phospholipase A <sub>2</sub> isozyme 1 | 24638470  | <i>Laticauda semifasciata</i> | L.NLVQFSNLQCVNK.G                     | 839.4205  | -17.33 |
| PLA <sub>2</sub> | Phospholipase A <sub>2</sub>           | 29422777  | <i>Bungarus candidus</i>      | R.TAALCFAEAPYK.R                      | 671.3289  | -0.21  |
|                  |                                        |           |                               | R.TAALCFAEAPYKR.R                     | 749.3789  | -0.94  |
| PLA <sub>2</sub> | Phospholipase A <sub>2</sub>           | 5924345   | <i>Austrelaps superbus</i>    | F.VCDCEVEAAK.C                        | 583.744   | -0.75  |
|                  |                                        |           |                               | R.FVCDCEVEAAK.C                       | 657.2776  | -1.64  |
|                  |                                        |           |                               | R.FVCDCEVEAAKCFAR.A                   | 616.6002  | -0.67  |



|                   |                                                    |           |                             |                                              |          |        |
|-------------------|----------------------------------------------------|-----------|-----------------------------|----------------------------------------------|----------|--------|
| PLA <sub>2</sub>  | Phospholipase A <sub>2</sub>                       | 152032644 | <i>Bungarus fasciatus</i>   | K.CSSLLNVPYVK.Q                              | 640.3388 | -0.89  |
|                   |                                                    |           |                             | R.TAALCFAEVPYK.R                             | 685.3411 | -5.15  |
|                   |                                                    |           |                             | K.CSSLLNVPYVKQYSYTCSEGNLTCSADNDECAAFICNCDR.T | 949.3816 | -15.15 |
| PLA <sub>2</sub>  | Phospholipase A <sub>2</sub> precursor             | 156257593 | <i>Bungarus fasciatus</i>   | L.NLFQFKNMIECAGTR.S                          | 914.9537 | 9.19   |
| PLA <sub>2</sub>  | Phospholipase A <sub>2</sub>                       | 48425218  | <i>Bungarus caeruleus</i>   | -.NL YQLMNM IQCAN.T                          | 815.3601 | 3.62   |
| PLA <sub>2</sub>  | Phospholipase A <sub>2</sub>                       | 129428    | <i>Laticauda colubrina</i>  | R.ATYYMYDYGCYCGK.G                           | 915.8485 | 4.89   |
| VEGF              | Hypothetical protein L345_04144                    | 565318860 | <i>Ophiophagus hannah</i>   | K.QLELNER.T                                  | 451.2393 | -2.7   |
|                   |                                                    |           |                             | K.HLYKQDPLTCK.C                              | 468.2431 | 0.01   |
|                   |                                                    |           |                             | P.DEVITFMTVFER.S                             | 743.8662 | 0.33   |
|                   |                                                    |           |                             | K.HFQSQHIHPMSFQQHSK.C                        | 526.7531 | -1.25  |
| Nucleotidase      | Ecto-5'-nucleotidase 1                             | 537444870 | <i>Micrurus fulvius</i>     | K.SIQEDPAVK.A                                | 493.7606 | -1.34  |
|                   |                                                    |           |                             | K.ASGNPILLNK.S                               | 513.8    | -1.45  |
|                   |                                                    |           |                             | K.FPILSANIRPK.G                              | 419.2554 | -0.42  |
|                   |                                                    |           |                             | K.LTILHTNDVHAR.V                             | 348.1948 | -1.63  |
|                   |                                                    |           |                             | Q.VPVVQAYAFGK.Y                              | 589.8316 | -0.77  |
|                   |                                                    |           |                             | R.VVSLNVLCTECR.V                             | 725.3618 | -1.72  |
|                   |                                                    |           |                             | K.IIALGHSGFKEDCR.I                           | 401.4565 | -1.06  |
|                   |                                                    |           |                             | K.NVKFPILSANIRPK.G                           | 399.9945 | -1.44  |
|                   |                                                    |           |                             | K.SIQEDPAVKAIEVSR.M                          | 510.2699 | -0.97  |
|                   |                                                    |           |                             | K.VLLPSFLAAGGDGYMLK.G                        | 639.0057 | -0.37  |
|                   |                                                    |           |                             | R.YDAMALGNHEFDNGLNLLDPLLK.N                  | 878.4308 | 12.9   |
| Snaclec           | Snaclec factor IX/factor X-binding protein B chain | 398488    | <i>Bothrops jararaca</i>    | -.DCPSDWSPYEGHCYR.V                          | 643.5813 | -1.72  |
| Snaclec           | C-type lectin-like protein 1                       | 13876735  | <i>Bungarus fasciatus</i>   | K.YIWEWTDR.S                                 | 584.7767 | 3.33   |
|                   |                                                    |           |                             | C.YTCPIDWLPK.N                               | 646.8193 | -2.29  |
|                   |                                                    |           |                             | K.FKPGCHLASLHSNADAVEFSEYISDYLTGQGHVWIGLR.D   | 856.0187 | 2.09   |
| Vespryn           | Ohanin precursor                                   | 70907886  | <i>Ophiophagus hannah</i>   | R.EWAVGLAGK.S                                | 465.7552 | -1.32  |
| Vespryn           | Vespryn22                                          | 336042222 | <i>Drysdalia coronoides</i> | K.ADVTFDSNTAFESLVSPDKK.T                     | 757.3772 | -0.73  |
|                   |                                                    |           |                             | K.TVENVGVPQVVPDNER.F                         | 1848.94  | -1.37  |
| Phosphodiesterase | Phosphodiesterase 1                                | 537444868 | <i>Micrurus fulvius</i>     | R.QWLAVR.N                                   | 386.726  | -2.33  |
|                   |                                                    |           |                             | K.SLQMADR.T                                  | 410.7023 | -0.93  |
|                   |                                                    |           |                             | K.TFLPIFVNSVN.-                              | 625.8428 | 0.34   |
|                   |                                                    |           |                             | R.TLGMLMEGLK.Q                               | 546.7946 | 2.58   |
|                   |                                                    |           |                             | R.IDKVNLMVDOR.Q                              | 401.5567 | -0.43  |
|                   |                                                    |           |                             | K.SPNNLWVEER.M                               | 622.7979 | -1.72  |
|                   |                                                    |           |                             | K.DFYTFDSEAIVK.N                             | 717.844  | 1.37   |
|                   |                                                    |           |                             | R.LKTFLPIFVNSVN.-                            | 746.9336 | 12.8   |
|                   |                                                    |           |                             | K.AATYFWPGSEVK.I                             | 678.3335 | -2.43  |
|                   |                                                    |           |                             | R.LWNYFHSTLLPK.Y                             | 759.907  | -2.41  |
|                   |                                                    |           |                             | R.TLGMLMEGLKQR.N                             | 459.584  | -0.98  |
|                   |                                                    |           |                             | R.MANVLCSCSEDCLTK.K                          | 894.3743 | -1.02  |
|                   |                                                    |           |                             | K.NVPKDFYTFDSEAIVK.N                         | 625.3174 | 8.52   |
|                   |                                                    |           |                             | K.SLQMADR.TLGMLMEGLK.Q                       | 637.3231 | 0.13   |
|                   |                                                    |           |                             | K.YISAYSQDILMPLWNSYTISK.S                    | 831.7507 | 0.26   |
|                   |                                                    |           |                             | K.SLQMADR.TLGMLMEGLKQR.N                     | 545.5359 | 8.53   |
|                   |                                                    |           |                             | R.NLHNCVNLILLADHGMIAISCNR.L                  | 666.8252 | -0.49  |
|                   |                                                    |           |                             | R.VRDVELLTGLDFYVLKQPLSETLR.L                 | 723.6427 | -13.39 |
|                   |                                                    |           |                             | R.NGLNVISGPIFDYNYDGHFDSYDTIK.Q               | 989.1311 | 8.8    |
|                   |                                                    |           |                             | K.VLSFILPHRPDENSECADKSPNNLWVEER.M            | 682.934  | -0.78  |



|                   |                                     |           |                                     |                            |           |        |
|-------------------|-------------------------------------|-----------|-------------------------------------|----------------------------|-----------|--------|
| Phosphodiesterase | Phosphodiesterase 1                 | 338855302 | <i>Crotalus adamanteus</i>          | R.NPAWWGGQPIWHTATYQGLK.A   | 771.0519  | 0.17   |
| Hyaluronidase     | Hyaluronidase                       | 113203681 | <i>Bitis arietans</i>               | R.NDQLLWLWR.D              | 622.3322  | -0.85  |
|                   |                                     |           |                                     | R.EDYALPVFVYAR.P           | 721.8697  | 0.47   |
|                   |                                     |           |                                     | K.HSDSNAFLHLFPESFR.I       | 476.7323  | -0.69  |
|                   |                                     |           |                                     | K.TFHGLGVIDWENWRPQWDR.N    | 603.7956  | -1.12  |
| VNGF              | Venom nerve growth factor precursor | 266299    | <i>Bungarus multicinctus</i>        | R.IDTACVCVISR.K            | 647.3177  | -0.68  |
|                   |                                     |           |                                     | R.FIRIDTACVCVISR.K         | 570.6304  | -3.52  |
|                   |                                     |           |                                     | R.HWNSYCTTTDTFVK.A         | 587.26    | -5.11  |
|                   |                                     |           |                                     | R.HWNSYCTTTDTFVKA.L        | 610.941   | -1.65  |
| LAAO              | L-amino-acid oxidase                | 126035653 | <i>Bungarus fasciatus</i>           | R.SALEECFR.E               | 506.2316  | -0.52  |
|                   |                                     |           |                                     | R.EADYEEFLEIAR.N           | 1484.69   | 3.09   |
|                   |                                     |           |                                     | K.TSADIVINDLSLIHQPK.N      | 989.0513  | -3.09  |
|                   |                                     |           |                                     | R.SALEECFREADYEEFLEIAR.N   | 826.3818  | 0.76   |
| LAAO              | L-amino acid oxidase                | 126035649 | <i>Bungarus multicinctus</i>        | R.VNTYRDEKEGWYNNMGPMR.L    | 782.3628  | -2.61  |
|                   |                                     |           |                                     | R.IYFAGEYTAR.V             | 1190.58   | -1.45  |
|                   |                                     |           |                                     | K.IQHDAEKVR.V              | 365.8679  | -1.19  |
|                   |                                     |           |                                     | Q.LNEFFQENENAWYFIK.N       | 1046.4948 | 0.57   |
| LAAO              | L-amino-acid oxidase                | 426205815 | <i>Crotalus durissus cumanensis</i> | L.QLNEFFQENENAWYFIK.N      | 740.6972  | 16.9   |
|                   |                                     |           |                                     | K.QVVPESLFAWER.V           | 730.8803  | -0.01  |
|                   |                                     |           |                                     | A.DLHYATVYWLEAEK.S         | 579.9537  | -1.02  |
|                   |                                     |           |                                     | R.NAGYIIAQLDGLYMGNLEWAKR.Q | 838.7606  | 13.5   |
| CRISP             | Cysteine-rich secretory protein     | 190195343 | <i>Bungarus candidus</i>            | R.CQTEWIK.S                | 482.731   | -0.94  |
|                   |                                     |           |                                     | K.QIVDKHNALR.R             | 1193.68   | 6.2    |
|                   |                                     |           |                                     | I.FSCGENLFMSSQPYAWSK.V     | 1069.9666 | -2.43  |
|                   |                                     |           |                                     | Q.MEWSNAAQNAK.R            | 682.3055  | -1.52  |
| CRISP             | Opharin precursor                   | 225547744 | <i>Ophiophagus hannah</i>           | K.FSCGENLFMSSQPYAWSR.V     | 1083.9828 | 9.76   |
|                   |                                     |           |                                     | R.ETVLLPR.K                | 414.2522  | -1.76  |
|                   |                                     |           |                                     | R.DRPQCIL.N                | 451.2308  | -1.80  |
|                   |                                     |           |                                     | L.TNTPEQDR.Y               | 480.7221  | -1.34  |
| SVMP              | Scutatease-1 (PIII)                 | 145982766 | <i>Notechis scutatus</i>            | K.WRETVLLPR.K              | 1169.6766 | -2.0   |
|                   |                                     |           |                                     | R.NDNAQLLTGI.E             | 529.7835  | 11.3   |
|                   |                                     |           |                                     | R.DRPQCILNKPLSTD.I         | 828.9215  | -1.05  |
|                   |                                     |           |                                     | K.LQHEAQCDSEECCEQCK.F      | 553.4692  | 15.5   |
| SVMP              | Metalloproteinase (PIII)            | 126035640 | <i>Bungarus multicinctus</i>        | I.ISFEPLSEFSSCSVQEHQR.Y    | 756.3429  | -11.28 |
|                   |                                     |           |                                     | K.KLLPR.K                  | 313.7206  | -1.53  |
|                   |                                     |           |                                     | R.NDNAQLLTR.I              | 522.7742  | -2.07  |
|                   |                                     |           |                                     | R.SACCNAATCK.L             | 571.7224  | -1.13  |
| SVMP              | Metalloproteinase MTP9 (PIII)       | 336042214 | <i>Drysdalia coronoides</i>         | K.RNDNAQLLTR.I             | 601.3170  | -1.41  |
|                   |                                     |           |                                     | R.KRNDNAQLLTR.I            | 333.1858  | -1.57  |
|                   |                                     |           |                                     | S.MVASTMAHEMGHNLGINHDR.A   | 556.0071  | 0.37   |
|                   |                                     |           |                                     | Q.SVAVIQDHSKR.T            | 1239.68   | -0.08  |
| SVMP              | Metalloproteinase MTP9 (PIII)       | 336042214 | <i>Drysdalia coronoides</i>         | Q.SAECPTDSFQR.N            | 1297.54   | -3.12  |
|                   |                                     |           |                                     | R.NGHPCQNNQGYCYNGK.C       | 637.5919  | -2.34  |
|                   |                                     |           |                                     | T.ISNQPLSEFSSCSVQEHQR.Y    | 2234.03   | 8.41   |
|                   |                                     |           |                                     |                            |           |        |



|                             |                                    |           |                                     |                                                |           |       |
|-----------------------------|------------------------------------|-----------|-------------------------------------|------------------------------------------------|-----------|-------|
| SVMP                        | Metalloproteinase (PIII)           | 126035635 | <i>Bungarus fasciatus</i>           | H.EMGHNLGINHDR.A                               | 348.9158  | -1.75 |
|                             |                                    |           |                                     | N.YFVEVGEECDGSGPR.D                            | 1803.73   | -1.32 |
|                             |                                    |           |                                     | R.NGLPCQNNQGYCYNKG.C                           | 943.8995  | 0.45  |
|                             |                                    |           |                                     | S.MVASTMAHEMGHNLGINHDR.A                       | 556.0071  | 0.37  |
| SVMP                        | P-III                              | 633276509 | <i>Micropechis ikaheka</i>          | D.LPEICTGR.S                                   | 473.2435  | -2.58 |
|                             |                                    |           |                                     | K.DDCDLPEICTGR.S                               | 725.7994  | -1.54 |
|                             |                                    |           |                                     | L.TNTPEQDRYLQVK.K                              | 1592.8    | 4.11  |
|                             |                                    |           |                                     | R.AAKDDCDLPEICTGR.S                            | 1720.76   | -0.23 |
| SVMP                        | MTP4 (PIII)                        | 537463069 | <i>Micrurus fulvius</i>             | K.NDCDLPELCTGR.S                               | 725.7994  | -1.53 |
|                             |                                    |           |                                     | P.LYEFSSCSVQQHQY.Y                             | 590.6011  | -1.29 |
|                             |                                    |           |                                     | S.DEPLYEFSSCSVQQHQY.Y                          | 2110.92   | 2.58  |
| SVMP                        | Atragin precursor(PIII)            | 224482347 | <i>Naja atra</i>                    | K.CGDGMVCSNR.Q                                 | 578.2201  | -0.94 |
|                             |                                    |           |                                     | R.TKPAYQFSSCSVR.E                              | 765.8715  | -0.84 |
|                             |                                    |           |                                     | R.NGLPCQNNQGYCYNKG.C                           | 944.8829  | -0.14 |
| SVMP                        | Metalloproteinase isoform 3 (PIII) | 109254964 | <i>Sistrurus catenatus edwardsi</i> | S.CTGQSADCPDDLHR.N                             | 1715.69   | 8.95  |
|                             |                                    |           |                                     | N.ELLEVGEECDGSPNTRC.D                          | 2124.88   | 9.52  |
| SVMP                        | SVMP-Hop-14, partial (PIII)        | 476539284 | <i>Hoplocephalus bungaroides</i>    | G.IDFNGTTVGR.A                                 | 540.7695  | -0.34 |
|                             |                                    |           |                                     | K.KSVAVIQDHSKR.T                               | 456.5958  | -1.92 |
| SVMP                        | SVMP-Hop-46, partial(PIII)         | 476539268 | <i>Hoplocephalus bungaroides</i>    | L.AYVGTLCSPK.F                                 | 548.2783  | -0.97 |
|                             |                                    |           |                                     | F.SVAVIQNYSR.D                                 | 569.2978  | -1.35 |
| SVMP                        | SVMP 1                             | 537444726 | <i>Micrurus fulvius</i>             | R.AAKDDCDLPELCTGR.S                            | 1720.76   | -0.23 |
|                             |                                    |           |                                     | K.GLFSEDYTETHYAPDGR.I                          | 653.2891  | -1.76 |
| SVMP                        | Metalloproteinase (PII)            | 82466485  | <i>Bothrops asper</i>               | K.YNSNLNTIR.T                                  | 1094.5745 | 14.3  |
| SVMP                        | Fur-1, partial (PI)                | 476538467 | <i>Furina ornata</i>                | S.SVAVIQDYSR.R                                 | 569.2978  | -1.37 |
| SVMP                        | jararagin (PIII)                   | 62468     | <i>Bothrops jararaca</i>            | R.MYELANIVNEIFR.Y                              | 814.4091  | -2.44 |
| SVMP                        | Metalloproteinase (PIII)           | 241995585 | <i>Philodryas olfersii</i>          | D.PDNGMVEPGTK.C                                | 572.7673  | -2.55 |
| SVMP                        | Leucurolysin-B (PIII)              | 223635807 | <i>Bothrops leucurus</i>            | Q.SAQCPDDEFKR.N                                | 663.2929  | -0.37 |
| SVMP                        | Ech-32 (PIII)                      | 476538400 | <i>Echiopsis curta</i>              | L.TYTPQNRYLQIKK.Y                              | 1782.9335 | -2.77 |
| SVMP                        | Cobrin precursor(PIII)             | 6006966   | <i>Naja naja</i>                    | K.LQHEAQCDSEECCEK.C                            | 641.5815  | -0.75 |
| SVMP                        | Metalloproteinase (PII)            | 297594122 | <i>Echis pyramidum leakeyi</i>      | K.SVGIVQDHSKEHLLVAATMAHEMGHNLMKHDGD.Q          | 614.2999  | 7.22  |
| SVMP                        | CohPH-3 (PII)                      | 522802426 | <i>Crotalus oreganus helleri</i>    | L.AYVGSMPKPKRSTGIIQDYSPINLVAVIMAHMGHNLGINHDR.G | 701.0615  | -7.11 |
| SVSP                        | Serine proteinase isoform 2        | 109254940 | <i>Sistrurus catenatus edwardsi</i> | R.AAYPEYGLPATSR.T                              | 1395.7    | 11.1  |
|                             |                                    |           |                                     | L.SLPSSPPSVGSVCR.I                             | 1429.72   | 9.45  |
| SVSP                        | SVSP 11                            | 387014258 | <i>Crotalus adamanteus</i>          | L.VVGGDECNINEHR.S                              | 500.5556  | -1.33 |
| Natriuretic peptide         | Natriuretic peptide                | 294961100 | <i>Bungarus flaviceps</i>           | I.SHTSDMGCR.H                                  | 350.8073  | -1.6  |
| Complement-depleting factor | Complement-depleting factor        | 126035660 | <i>Bungarus fasciatus</i>           | R.THNIEGTSYALLALK.M                            | 581.9935  | 1.11  |
